# Supplementary material for: Biochemical and structural characterization of Haemophilus influenzae nitroreductase in metabolizing nitroimidazoles
Source: PubMed Central journal article supplement — RSC Chem Biol. 2022 Feb 16;3(4):436–46. doi: 10.1039/d1cb00238d (PMC8985140; doi:10.1039/d1cb00238d), 2022-02-16
Supplement: CB-003-D1CB00238D-s001.pdf [file CB-003-D1CB00238D-s001.pdf]

**Biochemical and structural characterization of *Haemophilus influenzae* nitroreductase in metabolizing nitroimidazoles**

Dake Liu,<sup>\*a</sup> Thisuri N. Wanniarachchi,<sup>\*b</sup> Guangde Jiang,<sup>a</sup> Gustavo Seabra,<sup>a</sup> Shugeng Cao,<sup>c</sup> Steven D. Bruner,<sup>\*b</sup> Yousong Ding<sup>\*a</sup>

<sup>a</sup>Department of Medicinal Chemistry, Center for Natural Products, Drug Discovery and Development (CNPD3), University of Florida, Gainesville, Florida, 32610, USA

<sup>b</sup>Department of Chemistry, University of Florida, Gainesville, Florida, 32611, USA

<sup>c</sup>Department of Pharmaceutical Sciences, University of Hawai'i at Hilo, Hilo, Hawaii, 96720, USA.

**Table S1.** HiNfsB homologs highlighted in a black dashed circle shown in **Figure 2**.

| Sequence ID    | Predicted Function | Species                                              | Phylum         |
|----------------|--------------------|------------------------------------------------------|----------------|
| WP_135675601.1 | NDOR <sup>a</sup>  | <i>Actinobacillus indolicus</i>                      | Proteobacteria |
| WP_005817727.1 | NDOR               | <i>Actinobacillus minor</i>                          | proteobacteria |
| SUT88287.1     | nitroreductase     | <i>Actinobacillus rossii</i>                         | proteobacteria |
| WP_012073277.1 | NDOR               | <i>Actinobacillus succinogenes</i>                   | proteobacteria |
| EFX91759.1     | nitroreductase     | <i>Actinobacillus ureae</i> ATCC 25976               | proteobacteria |
| WP_150539066.1 | NDOR               | <i>Actinobacillus vicugnae</i>                       | proteobacteria |
| WP_150539758.1 | NDOR               | <i>Actinobacillus vicugnae</i>                       | proteobacteria |
| WP_205774381.1 | nitroreductase     | <i>Aggregatibacter actinomycetemcomitans</i>         | proteobacteria |
| WP_111395789.1 | NDOR               | <i>Aggregatibacter aphrophilus</i>                   | proteobacteria |
| WP_109849318.1 | NDOR               | <i>Aggregatibacter kilianii</i>                      | proteobacteria |
| WP_109078874.1 | NDOR               | <i>Aggregatibacter kilianii</i>                      | proteobacteria |
| WP_111295653.1 | NDOR               | <i>Aggregatibacter segnis</i>                        | proteobacteria |
| ERH28656.1     | nitroreductase     | <i>Aggregatibacter</i> sp. oral taxon 458str. W10330 | proteobacteria |
| WP_034294564.1 | NDOR               | <i>Alysiella crassa</i>                              | proteobacteria |
| WP_103853092.1 | NDOR               | <i>Avibacterium</i>                                  | proteobacteria |
| WP_115249331.1 | NDOR               | <i>Avibacterium avium</i>                            | proteobacteria |
| WP_046098299.1 | NDOR               | <i>Avibacterium paragallinarum</i>                   | proteobacteria |
| WP_011201269.1 | NDOR               | <i>Basfia</i>                                        | proteobacteria |
| WP_218015861.1 | nitroreductase     | <i>Bergeriella denitrificans</i>                     | proteobacteria |
| WP_015431668.1 | NDOR               | <i>Bibersteinia trehalosi</i>                        | proteobacteria |
| MBP7302631.1   | NDOR               | <i>Brachymonas</i> sp.                               | proteobacteria |
| WP_115072860.1 | NDOR               | <i>Canicola haemoglobinophilus</i>                   | proteobacteria |
| WP_048713719.1 | NDOR               | <i>Cardiobacterium hominis</i>                       | proteobacteria |
| RKW17646.1     | NDOR               | <i>Cardiobacterium</i> sp.                           | proteobacteria |
| WP_100295698.1 | NDOR               | <i>Caviibacterium pharyngocola</i>                   | proteobacteria |
| WP_034613865.1 | NDOR               | <i>Chelonobacter oris</i>                            | proteobacteria |
| WP_100289829.1 | NDOR               | <i>Conservatibacter flavescens</i>                   | proteobacteria |
| WP_131976547.1 | NDOR               | <i>Cricetibacter osteomyelitidis</i>                 | proteobacteria |
| WP_012031187.1 | NDOR               | <i>Dichelobacter nodosus</i>                         | proteobacteria |
| WP_049258825.1 | NDOR               | <i>Eikenella</i>                                     | proteobacteria |
| WP_126983001.1 | NDOR               | <i>Eikenella corrodens</i>                           | proteobacteria |
| WP_153714917.1 | NDOR               | <i>Eikenella corrodens</i>                           | proteobacteria |
| WP_067593869.1 | NDOR               | <i>Eikenella longinqua</i>                           | proteobacteria |
| WP_197904047.1 | NDOR               | <i>Eikenella</i> sp. S3360                           | proteobacteria |
| WP_123957534.1 | NDOR               | <i>Frederiksenia canicola</i>                        | proteobacteria |
| WP_010945332.1 | NDOR               | <i>Haemophilus ducreyi</i>                           | proteobacteria |
| WP_078236793.1 | NDOR               | <i>Haemophilus paracuniculus</i>                     | proteobacteria |
| WP_181874609.1 | NDOR               | <i>Haemophilus parahaemolyticus</i>                  | proteobacteria |
| WP_115912646.1 | NDOR               | <i>Haemophilus parainfluenzae</i>                    | proteobacteria |
| WP_197555712.1 | NDOR               | <i>Haemophilus parainfluenzae</i>                    | proteobacteria |
|                | HiNfsB             | <i>Haemophilus influenzae</i>                        | proteobacteria |
| WP_095177020.1 | NDOR               | <i>Haemophilus pittmaniae</i>                        | proteobacteria |
| WP_215767787.1 | nitroreductase     | <i>Haemophilus</i> sp. SZY H8                        | proteobacteria |
| WP_207799970.1 | nitroreductase     | <i>Haemophilus sputorum</i>                          | proteobacteria |
| WP_192574124.1 | NDOR               | <i>Haemophilus sputorum</i>                          | proteobacteria |
| WP_075293801.1 | NDOR               | <i>Histophilus somni</i>                             | proteobacteria |
| EGC17376.1     | nitroreductase     | <i>Kingella denitrificans</i> ATCC 33394             | proteobacteria |
| WP_042949531.1 | NDOR               | <i>Kingella kingae</i>                               | proteobacteria |
| WP_032136559.1 | NDOR               | <i>Kingella negevensis</i>                           | proteobacteria |
| WP_132300857.1 | NDOR               | <i>Lonepinella koalarum</i>                          | proteobacteria |
| WP_188156245.1 | NDOR               | <i>Mannheimia bovis</i>                              | proteobacteria |

## Continued

| Sequence ID    | Predicted Function          | Species                                   | Phylum         |
|----------------|-----------------------------|-------------------------------------------|----------------|
| WP_192574124.1 | NDOR                        | Haemophilus sputorum                      | proteobacteria |
| WP_075293801.1 | NDOR                        | Histophilus somni                         | proteobacteria |
| EGC17376.1     | nitroreductase              | Kingella denitrificans ATCC 33394         | proteobacteria |
| WP_042949531.1 | NDOR                        | Kingella kingae                           | proteobacteria |
| WP_032136559.1 | NDOR                        | Kingella negevensis                       | proteobacteria |
| WP_132300857.1 | NDOR                        | Lonepinella koalarum                      | proteobacteria |
| WP_188156245.1 | NDOR                        | Mannheimia bovis                          | proteobacteria |
| WP_042803014.1 | NDOR                        | Mannheimia granulomatis                   | proteobacteria |
| WP_027073341.1 | NDOR                        | Mannheimia granulomatis                   | proteobacteria |
| WP_126301985.1 | NDOR                        | Mannheimia haemolytica                    | proteobacteria |
| WP_126301237.1 | NDOR                        | Mannheimia haemolytica                    | proteobacteria |
| WP_044470289.1 | NDOR                        | Mannheimia massiliogueldmaensis           | proteobacteria |
| WP_176812525.1 | NDOR                        | Mannheimia pernigra                       | proteobacteria |
| WP_025236058.1 | NDOR                        | Mannheimia sp.USDA-ARS-USMARC-1261        | proteobacteria |
| WP_025235183.1 | NDOR                        | Mannheimia sp.USDA-ARS-USMARC-1261        | proteobacteria |
| WP_138316925.1 | NDOR                        | Mannheimia varigena                       | proteobacteria |
| WP_025218067.1 | NDOR                        | Mannheimia varigena                       | proteobacteria |
| WP_133545162.1 | NDOR                        | Mesocricetibacter intestinalis            | proteobacteria |
| WP_065256401.1 | NDOR                        | Moraxella                                 | proteobacteria |
| WP_019518835.1 | NDOR                        | Moraxella boevrei                         | proteobacteria |
| WP_078275161.1 | NDOR                        | Moraxella bovis                           | proteobacteria |
| WP_029103779.1 | NDOR                        | Moraxella caprae                          | proteobacteria |
| WP_152704388.1 | NDOR                        | Moraxella catarrhalis                     | proteobacteria |
| WP_079324653.1 | NDOR                        | Moraxella equi                            | proteobacteria |
| WP_067006831.1 | NDOR                        | Moraxella nonliquefaciens                 | proteobacteria |
| WP_066802655.1 | NDOR                        | Moraxella oblonga                         | proteobacteria |
| WP_063514818.1 | NDOR                        | Moraxella ovis                            | proteobacteria |
| WP_047977655.1 | NDOR                        | Muribacter muris                          | proteobacteria |
| WP_040976402.1 | nitroreductase              | Necropsobacter massiliensis               | proteobacteria |
| WP_123803883.1 | NDOR                        | Neisseria                                 | proteobacteria |
| WP_123796250.1 | NDOR                        | Neisseria animalis                        | proteobacteria |
| WP_049260955.1 | NDOR                        | Neisseria bacilliformis                   | proteobacteria |
| WP_089036383.1 | NDOR                        | Neisseria chenwenguii                     | proteobacteria |
| WP_123806104.1 | NDOR                        | Neisseria chenwenguii                     | proteobacteria |
| WP_204812176.1 | NDOR                        | Neisseria elongata                        | proteobacteria |
| WP_106743254.1 | NDOR                        | Neisseria iguanae                         | proteobacteria |
| WP_049322340.1 | NDOR                        | Neisseria meningitidis                    | proteobacteria |
| 6WT2_A         | Nitroreductase              | Neisseria meningitidis                    | proteobacteria |
| EFM04285.1     | Nitroreductase <sup>b</sup> | Neisseria meningitidis ATCC 13091         | proteobacteria |
| WP_016687204.1 | NDOR                        | Neisseria sicca                           | proteobacteria |
| WP_203026330.1 | NDOR                        | Neisseria sp. HSUH001                     | proteobacteria |
| WP_003778288.1 | NDOR                        | Neisseriaceae                             | proteobacteria |
| MBQ9601000.1   | NDOR                        | Neisseriaceae bacterium                   | proteobacteria |
| WP_132500780.1 | NDOR                        | Nicoletella semolina                      | proteobacteria |
| WP_121123079.1 | NDOR                        | Otariodibacter oris                       | proteobacteria |
| WP_111750553.1 | NDOR                        | Glaesserella                              | proteobacteria |
| VEG69038.1     | Nitroreductase              | Pasteurella aerogenes                     | proteobacteria |
| WP_211597867.1 | Nitroreductase              | Pasteurella atlantica                     | proteobacteria |
| WP_071523279.1 | NDOR                        | Pasteurella multocida                     | proteobacteria |
| WP_126373477.1 | NDOR                        | Pasteurella multocida                     | proteobacteria |
| QIM62210.1     | NDOR                        | Pasteurellaceae bacterium Orientaloternb1 | proteobacteria |
| OOH90305.1     | NDOR                        | Pasteurellaceae bacterium 15-036681       | proteobacteria |

## Continued

| Sequence ID    | Prediction Function     | Species                           | Phylum         |
|----------------|-------------------------|-----------------------------------|----------------|
| TNH03914.1     | NDOR                    | Pasteurellaceae bacterium Phil11  | proteobacteria |
| QIW15646.1     | NDOR                    | Pasteurellaceae bacterium RH1A    | proteobacteria |
| SUB34095.1     | Putative nitroreductase | Pasteurella mairii                | proteobacteria |
| WP_159990264.1 | NDOR                    | Pelistega ratti                   | proteobacteria |
| WP_115314965.1 | NDOR                    | Phocoenobacter uteri              | proteobacteria |
| VTM25380.1     | NDOR                    | Pseudomonas stutzeri              | proteobacteria |
| WP_077543984.1 | NDOR                    | Rodentibacter genomosp.2          | proteobacteria |
| WP_077582427.1 | NDOR                    | Rodentibacter heylii              | proteobacteria |
| WP_077462997.1 | NDOR                    | Rodentibacter heylii              | proteobacteria |
| WP_077424279.1 | NDOR                    | Rodentibacter myodis              | proteobacteria |
| WP_077584658.1 | NDOR                    | Rodentibacter pneumotropicus      | proteobacteria |
| WP_077499819.1 | NDOR                    | Rodentibacter rarus               | proteobacteria |
| WP_077495209.1 | NDOR                    | Rodentibacter ratti               | proteobacteria |
| WP_194811986.1 | NDOR                    | Rodentibacter sp. DSM 111151      | proteobacteria |
| WP_077421316.1 | NDOR                    | Rodentibacter trehalosifermentans | proteobacteria |
| MBF1647295.1   | NDOR                    | Rothia dentocariosa               | actinobacteria |
| WP_135008398.1 | NDOR                    | Rothia dentocariosa               | actinobacteria |
| MBS6433272.1   | NDOR                    | Rothia mucilaginosa               | actinobacteria |
| MBF1659027.1   | NDOR                    | Rothia mucilaginosa               | actinobacteria |
| WP_204863289.1 | NDOR                    | Rothia mucilaginosa               | actinobacteria |
| WP_012902713.1 | NDOR                    | Rothia mucilaginosa               | actinobacteria |
| WP_070680901.1 | NDOR                    | Rothia sp.HMSC072E10              | actinobacteria |
| WP_002641763.1 | NDOR                    | Simonsiella muelleri              | proteobacteria |
| WP_157394976.1 | NDOR                    | Ursidibacter arcticus             | proteobacteria |
| WP_124211380.1 | NDOR                    | Vespertiliibacter pulmonis        | proteobacteria |

<sup>a</sup>: NDOR: NAD(P)H-dependent oxidoreductase; <sup>b</sup>: PDB: 6WT2

**Table S2.** Primers used in this work.

| Primer Name    | Sequence (5' to 3')                    |
|----------------|----------------------------------------|
| HinfsbFNde1    | ACTCATATGACTCAACTTACTCGTGAA            |
| HinfsbRHindIII | ACTAAGCTTCCCCACCCATTTCACTTCA           |
| nfsbR20A-F     | GCTCAACAGCGTATTACGACCC                 |
| nfsbR20A-R     | GGGTCGTAATACGCTGTTGAGC                 |
| nfsbR20K-F     | GCTCAACAAAATATTACGACCC                 |
| nfsbR20K-R     | GGGTCGTAATATTTTGTGAGC                  |
| nfsbW71A-F     | ACCTTTTAGCGCGGAATGATAAATCAG            |
| nfsbW71A-R     | TTCATTTTTTCGCGTAAGGTTTT                |
| nfsbW71F-F     | ACCTTTTAGCTTCGGAATGATAAATCAG           |
| nfsbW71F-R     | TTCATTTTTTCGCGTAAGGTTTT                |
| nfsbK119A-F    | CCCTCACAGCATACAAAGCCCTG                |
| nfsbK119A-R    | CAGGGCTTTGTATGCTGTGAGGG                |
| nfsbY120A-F    | CCTCACAAAAGCCAAAGCCCTGCAAGAAG          |
| nfsbY120A-R    | GCGGCTTGTTGTTGCTCTGCG                  |
| EcnfsbFNde1    | ACTCATATGGATATCATTCTGTGCGCTTAAAGCG     |
| EcnfsbRHindIII | ACTAAGCTTTTACACTTCGGTTAAGGTGATGTTTTGCG |

**Table S3.** The refinement statistics for the structure of HiNfsB in a complex with 1-methyl-5-nitroimidazole (**12**) and nicotinic acid.

|                                | <b>HiNfsB_12</b>                     | <b>HiNfsB_nicotinic acid</b>       |
|--------------------------------|--------------------------------------|------------------------------------|
| Resolution range               | 45.92 - 2.255 (2.336 - 2.255)        | 45.79 - 2.301 (2.384 - 2.301)      |
| Space group                    | P 31                                 | P 31                               |
| Unit cell                      | 57.3148 57.3148 121.007<br>90 90 120 | 57.084 57.084 121.459<br>90 90 120 |
| Total reflections              | 108609 (10407)                       | 182492 (9637)                      |
| Unique reflections             | 20949 (2086)                         | 19464 (1838)                       |
| Multiplicity                   | 5.2 (5.0)                            | 9.4 (5.2)                          |
| Completeness (%)               | 99.90 (99.05)                        | 99.13 (92.50)                      |
| Mean I/sigma(I)                | 7.82 (3.60)                          | 19.15 (2.89)                       |
| Wilson B-factor                | 41.71                                | 49.71                              |
| R-merge                        | 0.1776 (0.8612)                      | 0.06491 (0.5064)                   |
| R-meas                         | 0.1983 (0.9648)                      | 0.06848 (0.5643)                   |
| R-pim                          | 0.087 (0.429)                        | 0.02163 (0.2393)                   |
| CC1/2                          | 0.976 (0.636)                        | 0.999 (0.807)                      |
| CC*                            | 0.994 (0.882)                        | 1 (0.945)                          |
| Reflections used in refinement | 20946 (2083)                         | 19461 (1838)                       |
| Reflections used for R-free    | 970 (107)                            | 1020 (95)                          |
| R-work                         | 0.1784 (0.2637)                      | 0.1846 (0.2543)                    |
| R-free                         | 0.2224 (0.3560)                      | 0.2261 (0.2892)                    |
| CC(work)                       | 0.964 (0.803)                        | 0.966 (0.827)                      |
| CC(free)                       | 0.935 (0.636)                        | 0.960 (0.842)                      |
| Number of non-H atoms          | 3684                                 | 3647                               |
| macromolecules                 | 3516                                 | 3516                               |
| ligands                        | 83                                   | 90                                 |
| solvent                        | 85                                   | 41                                 |
| Protein residues               | 438                                  | 438                                |
| RMS(bonds)                     | 0.009                                | 0.016                              |
| RMS(angles)                    | 0.98                                 | 1.26                               |
| Ramachandran favored (%)       | 96.54                                | 96.77                              |
| Ramachandran allowed (%)       | 3.46                                 | 3.23                               |
| Ramachandran outliers (%)      | 0.00                                 | 0.00                               |
| Rotamer outliers (%)           | 0.00                                 | 1.56                               |
| Clashscore                     | 5.19                                 | 5.76                               |
| Average B-factor               | 46.29                                | 54.77                              |
| macromolecules                 | 46.43                                | 54.81                              |
| ligands                        | 39.44                                | 56.08                              |
| solvent                        | 46.84                                | 48.37                              |

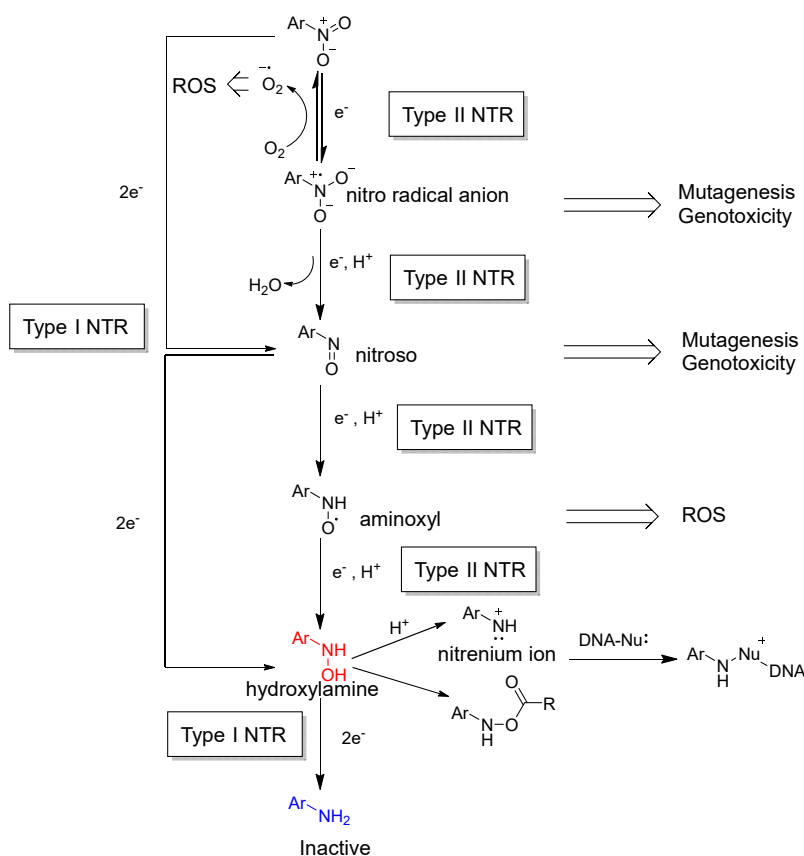

**Figure S1.** Nitroreduction catalyzed by Type I and Type II nitroreductases (NTRs).

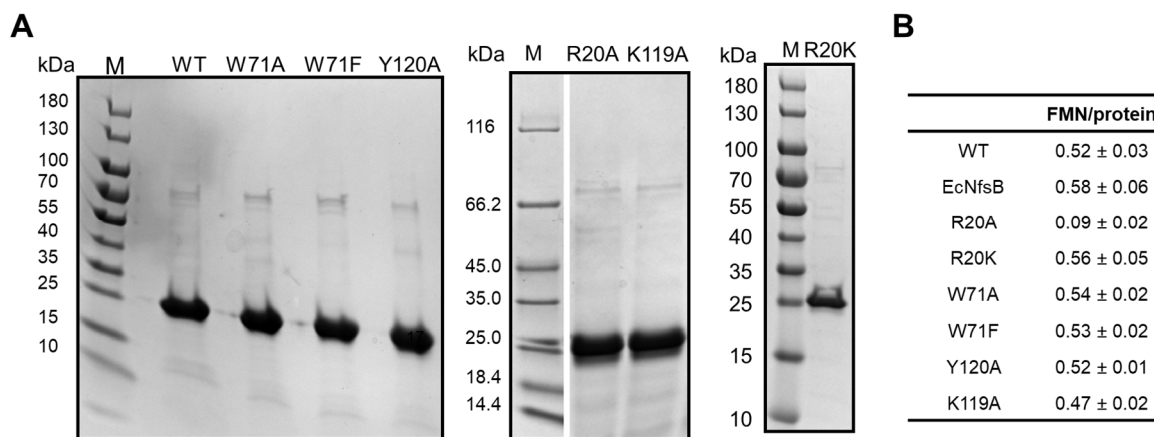

**Figure S2.** (A) SDS-PAGE analysis of recombinant HiNfsB and its mutants. The calculated molecular weight of recombinant HiNfsB is about 24 kDa. (B) Flavin content of HiNfsB, EcNfsB and its mutants. FMN content in each protein sample was quantitated in the HPLC analysis and then normalized again the protein concentration. Each sample was analyzed at least twice. Value is expressed as mean ± standard deviation.

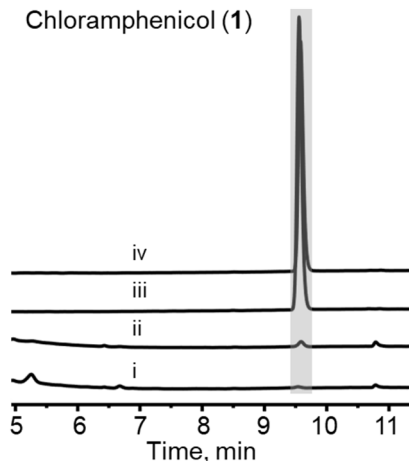

**Figure S3.** LC analysis of the HiNfsB reaction with chloramphenicol as substrate. The reactions contained 2 mM chloramphenicol, 1  $\mu$ M enzyme, 1 mM NADP<sup>+</sup>, 20 mM glucose, and 16  $\mu$ M GDH in 100 mM phosphate buffer (pH 7.4) and were incubated at room temperature for 10 (ii) or 30 (i) min. Negative controls contained no enzyme (iii: 30 min; iv: 10 min). Chloramphenicol peak is highlighted with a grey bar.

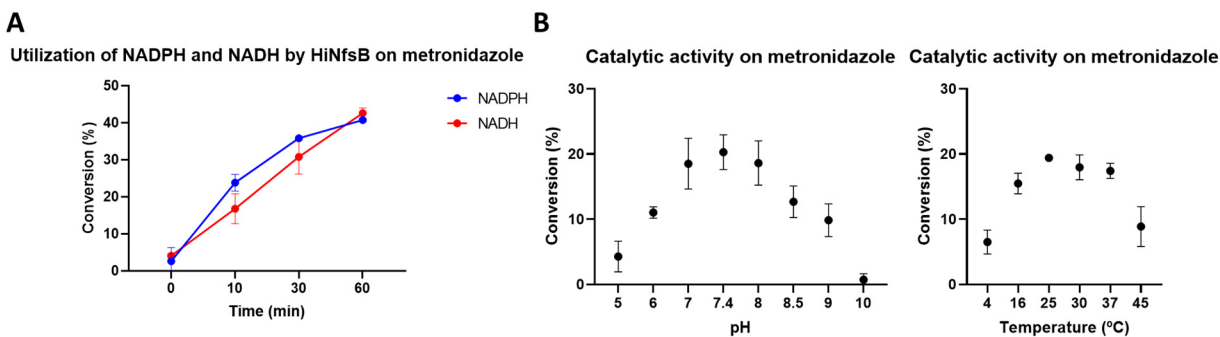

**Figure S4.** Biochemical characterization of HiNfsB. **(A)** HiNfsB uses both NADPH and NADH in converting MTZ. The reactions contained 2 mM MTZ, 0.1  $\mu$ M HiNfsB and 4 mM NADH or NADPH in 100 mM phosphate buffer (pH 7.4) and were incubated at room temperature. Samples were collected at 0 min, 10 min, 30 min and 60 min for the HPLC analysis. **(B)** pH and temperature dependence of HiNfsB in converting MTZ. The reactions contained 2 mM MTZ, 0.1  $\mu$ M enzyme, 1 mM NADP<sup>+</sup>, 20 mM glucose, and 16  $\mu$ M GDH in 100 mM buffer with pH ranging from 5 to 10 and were incubated at 4 to 45 °C for 10 min. MTZ consumption was quantitated at 320 nm. The data represent means  $\pm$  s.d. of three independent experiments.

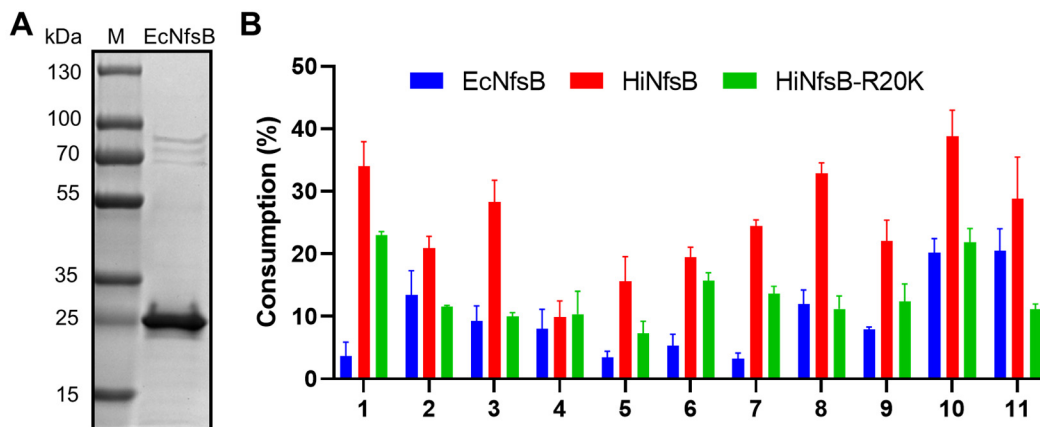

**Figure S5.** (A) SDS-PAGE analysis of recombinant EcNfsB. (B) Consumption of clinically used nitroimidazoles by EcNfsB, HiNfsB and its R20K mutant under the same conditions. Recombinant EcNfsB catalyzes limited consumption of selected nitroimidazoles. The enzymatic reaction contained 2 mM substrate, 1  $\mu$ M enzyme, 1 mM NADP<sup>+</sup>, 20 mM glucose, and 16  $\mu$ M GDH in 100 mM phosphate buffer (pH 7.4) and were incubated at room temperature for 10 min. The data represent means  $\pm$  s.d. of three independent experiments.

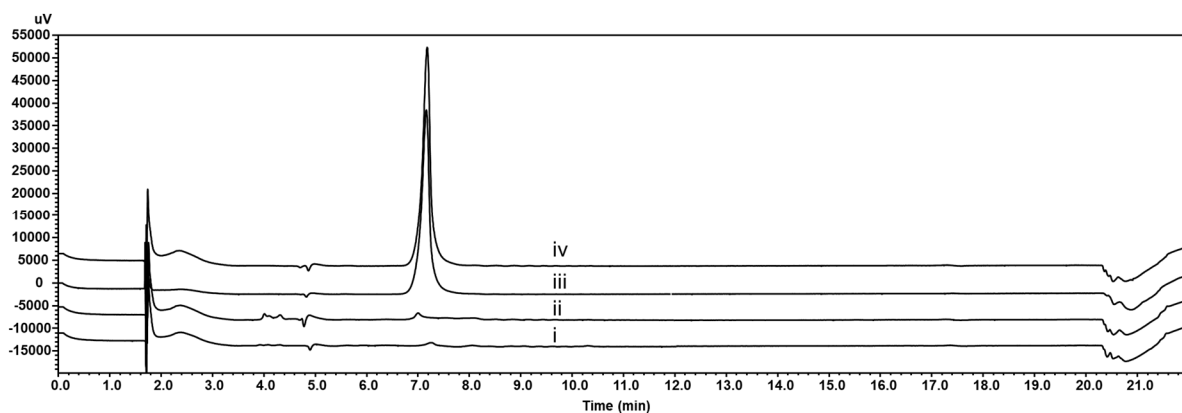

**Figure S6.** Full LC traces of the HiNfsB reactions with metronidazole (**2**) as substrate. The reactions contained 2 mM substrate, 1  $\mu$ M enzyme, 1 mM NADP<sup>+</sup>, 20 mM glucose, and 16  $\mu$ M GDH in 100 mM phosphate buffer (pH 7.4) and were incubated at room temperature for 3 hours under aerobic (i) or anaerobic (ii) condition. Negative controls lacked NADP<sup>+</sup> (iii) or enzyme (iv).

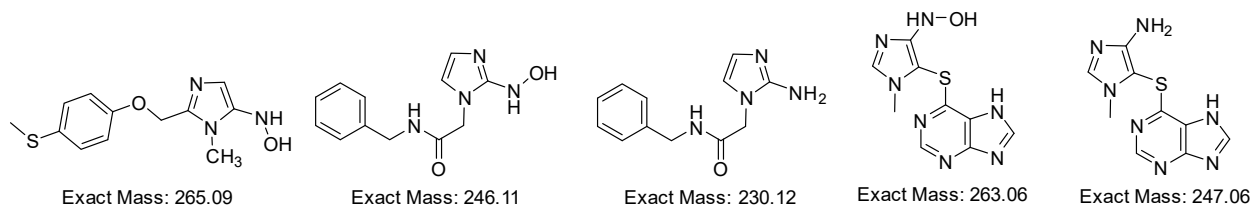

**Figure S7.** Chemical structures and exact masses of hydroxylamine and amine metabolites of compounds **8**, **10** and **11**.



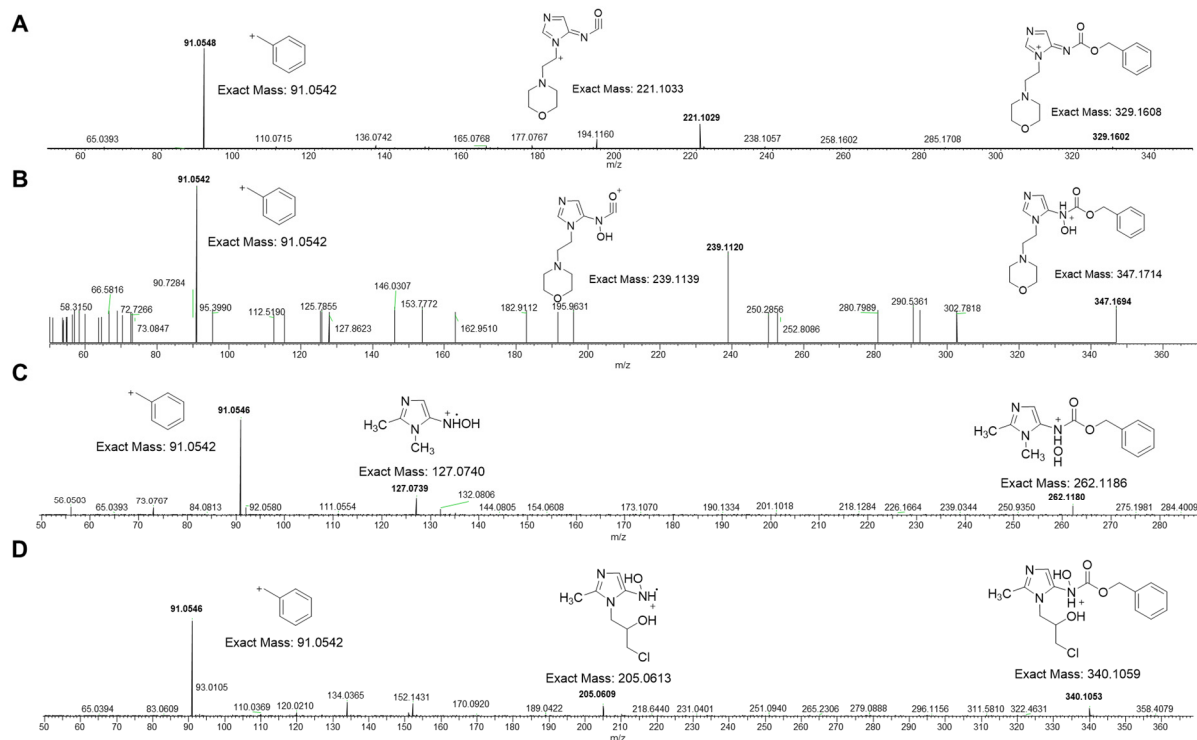

**Figure S8.** HRMS/MS fragmentation of CBZ derivatives in the HiNFsB reactions with compounds **4** (A), **5** (B) and **7** (D) as substrates.

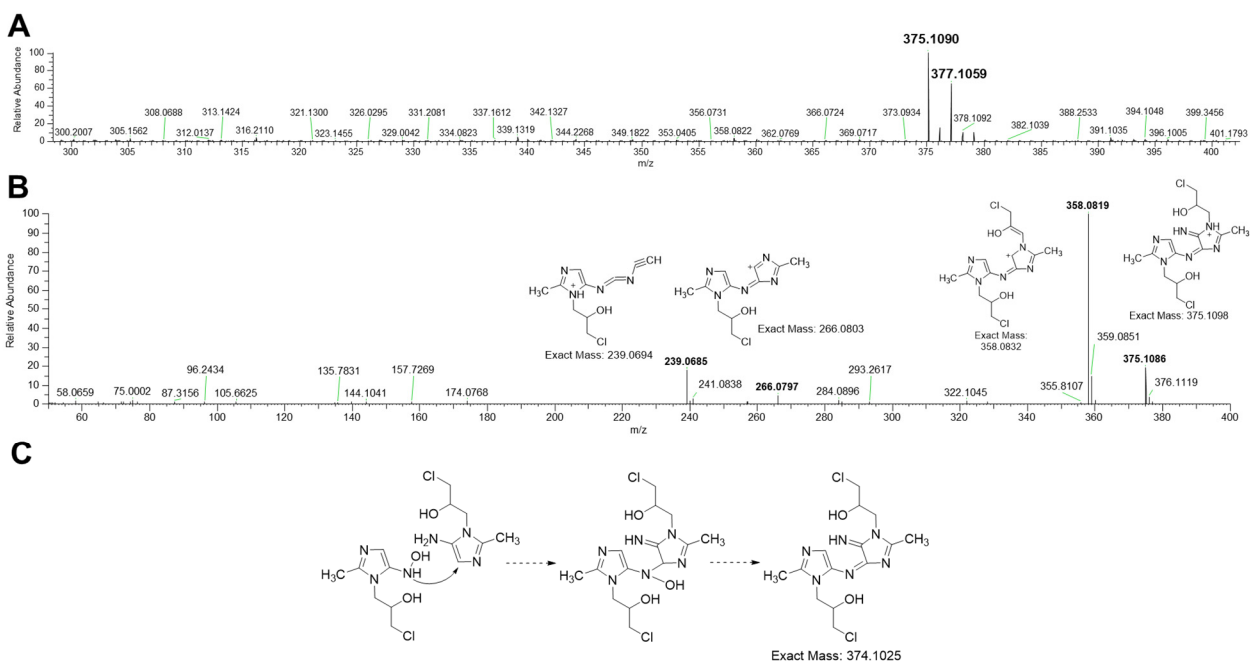

**Figure S9.** The formation of a potential dimeric metabolite from ornidazole (**5**) by HiNFsB. HRMS (A) and MS/MS (B) analysis provided structural information of this metabolite. Putative fragment structures were shown. (C): A putative way to form the dimeric metabolite from one molecule hydroxylamine and one molecule amine ornidazole species.

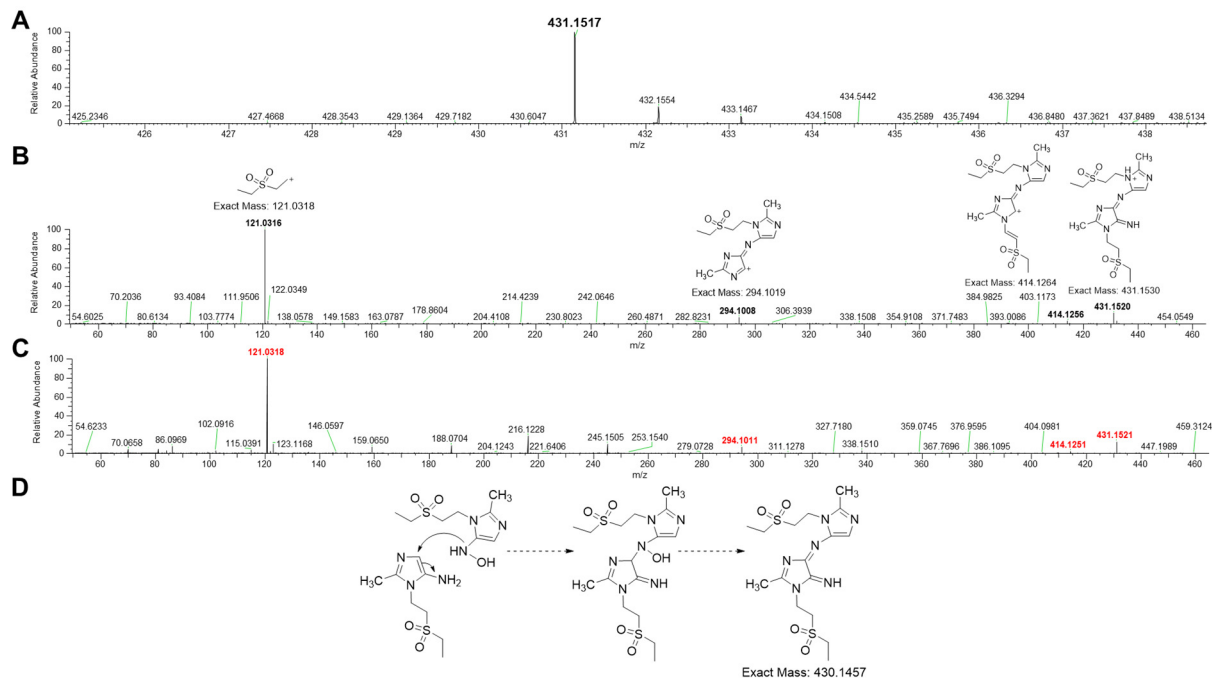

**Figure S10.** The formation of a potential dimeric metabolite from tinidazole (**6**) by HiNfsB. HRMS (**A**) and MS/MS (**B**) analysis provided structural information of this metabolite. Putative fragment structures were shown. (**C**): HRMS/MS trace of the metabolite produced from tinidazole (**6**) by HiNfsB expression *E. coli* cells. (**D**): A putative way to form the dimeric metabolite from one molecule hydroxylamine and one molecule amine tinidazole species.

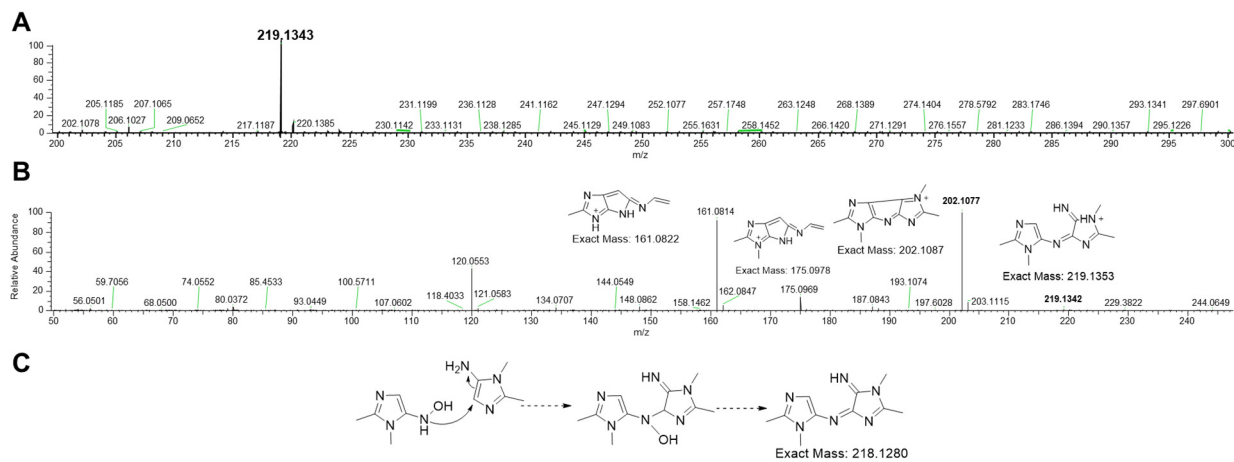

**Figure S11.** The formation of a potential dimeric metabolite from dimetridazole (**7**) by HiNfsB. HRMS (**A**) and MS/MS (**B**) analysis provided structural information of this metabolite. Putative fragment structures were shown. (**C**): A putative way to form the dimeric metabolite from one molecule hydroxylamine and one molecule amine dimetridazole species.

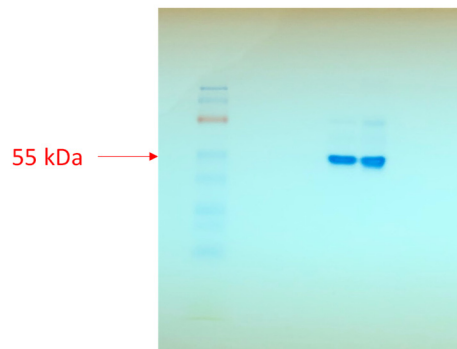

**Figure S12.** Native gel analysis revealed the homodimer of HiNfsB in solution.

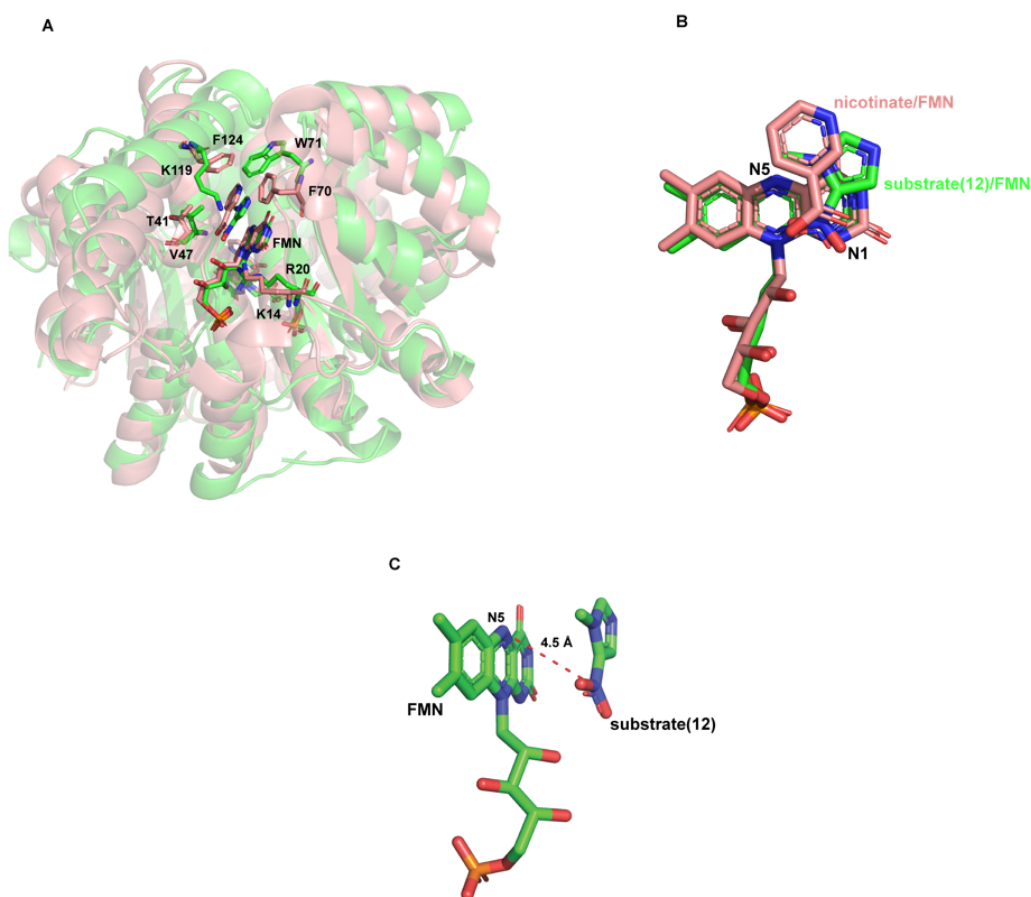

**Figure S13.** (A) Structure alignment of HiNfsB (green) with EcNfsB (PDB 1ICU, light gold). The secondary structure elements of the two enzymes are conserved. Active site residues R20, V47, W71 and K119 of HiNfsB and the corresponding residues of EcNfsB (K14, T41, F70, and F124) are shown as sticks. (B) Alignment of bound substrates and cofactors of HiNfsB (green) and EcNfsB. The substrate (12) of HiNfsB is rotated relative to nicotinate of EcNfsB to allow similar positioning for the nitro group of substrate (12) and the carboxylate of nicotinate. (C) The substrate (12) is stacked against the isoalloxazine ring of FMN placing the substrate nitro group at a distance of 4.5 Å from the N5 of FMN.

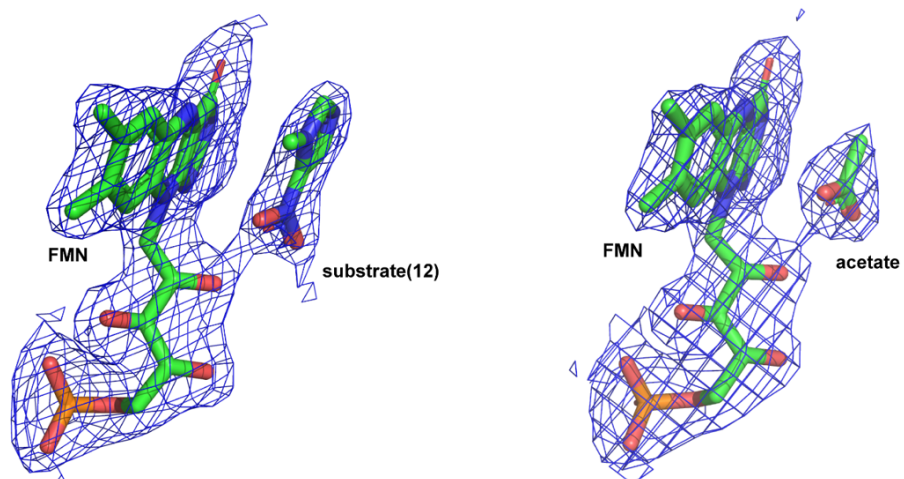

**Figure S14.** 2Fo-Fc electron density map contoured at  $1.0\sigma$  around the cofactor FMN, bound substrate in active site 1 (**A**) and acetate in active site 2 (**B**).

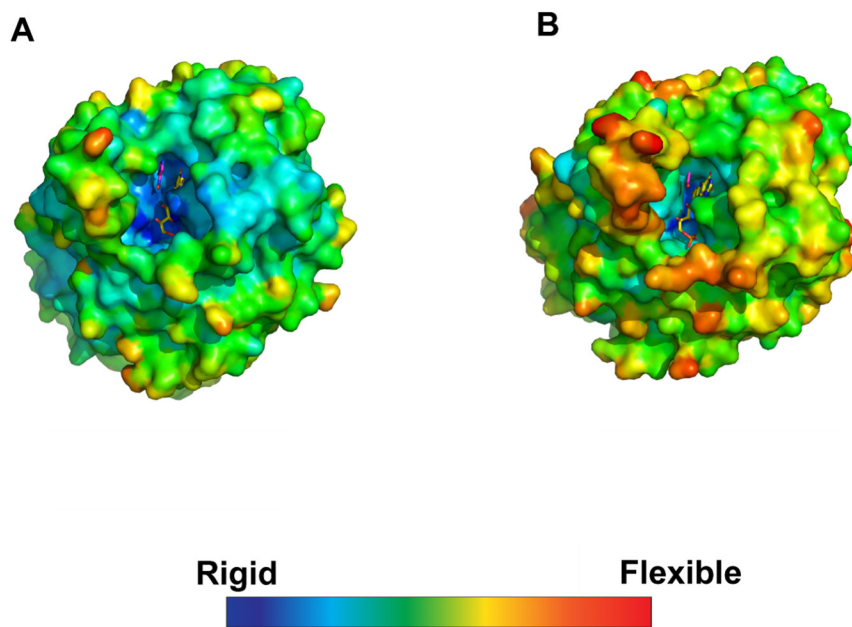

**Figure S15.** Surface view of the two active sites of HiNfsB. Substrate (**12**) is bound in the active site 1 (**A**) where residues are more ordered than acetate bound active site 2 (**B**).

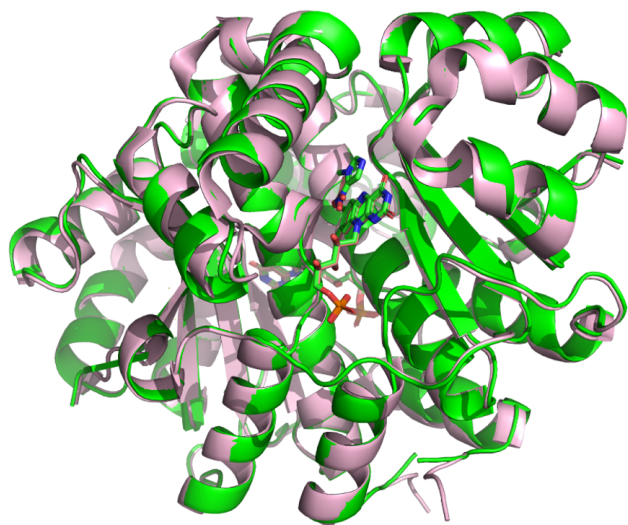

**Figure S16.** Structure alignment of HiNfsB/nicotinate (green) with recently deposited crystal structure of putative NAD(P)H-flavin oxidoreductase from *Haemophilus influenzae* R2846 (PDB 7LDQ, light pink). The secondary structural elements are conserved in the two structures except for the residue range Lys67-Ile74. The calculated RMSD between HiNfsB and PDB structure 7LDQ is 0.958 Å on all atoms.

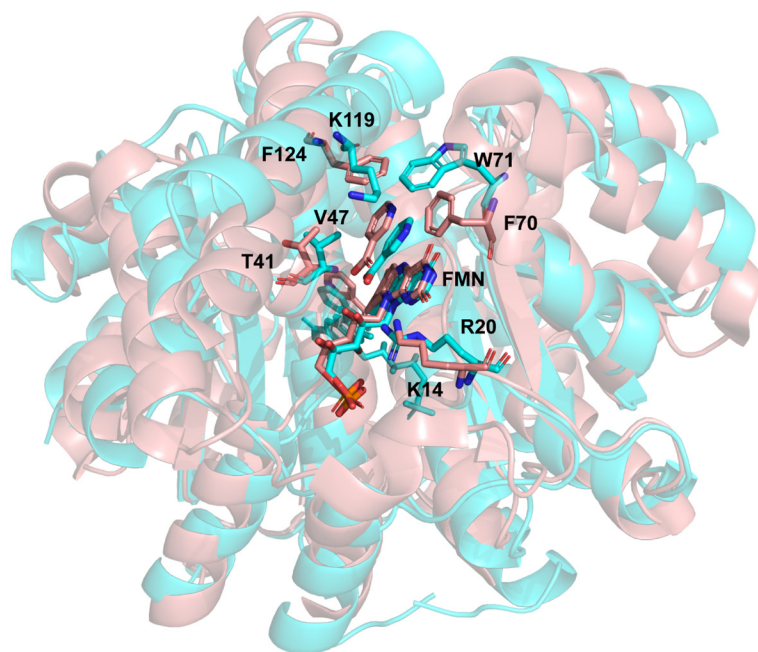

**Figure S17.** Structure alignment of HiNfsB/nicotinate (blue) with EcNfsB/nicotinate (PDB 1ICU, light gold).

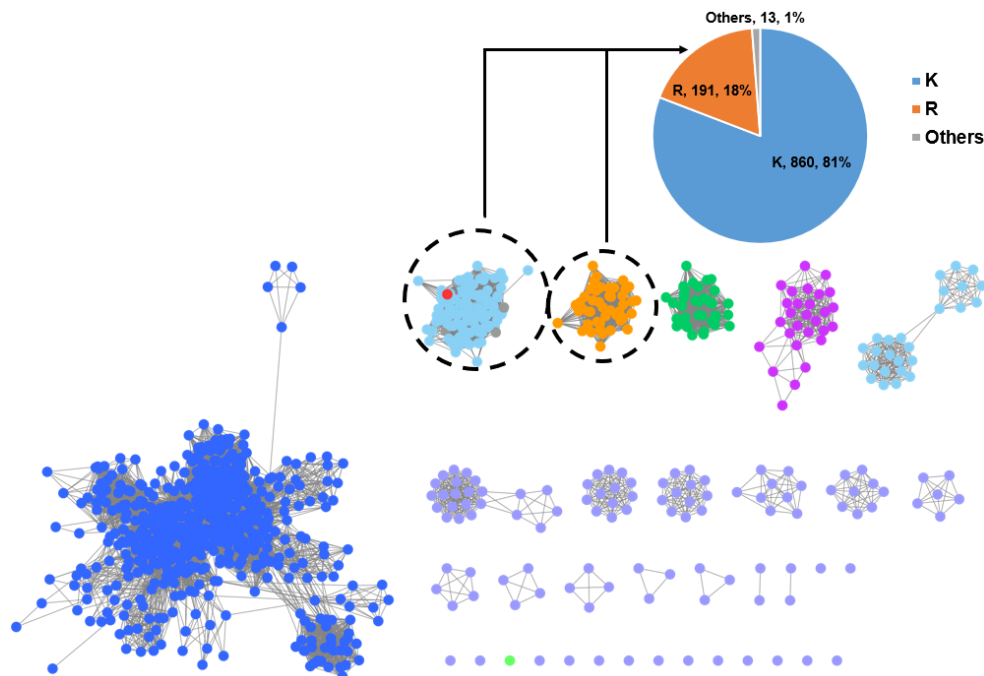

**Figure S18.** Structure alignment of all 1,046 HiNfsB homologs shown in Figure 2 identified conserved Arg or Lys in the residue 20 (numbered by HiNfsB sequence). All 191 homologs in the HiNfsB cluster and the cluster in orange (homologs from *Streptococcus*, Figure 2) carry Arg in this position.

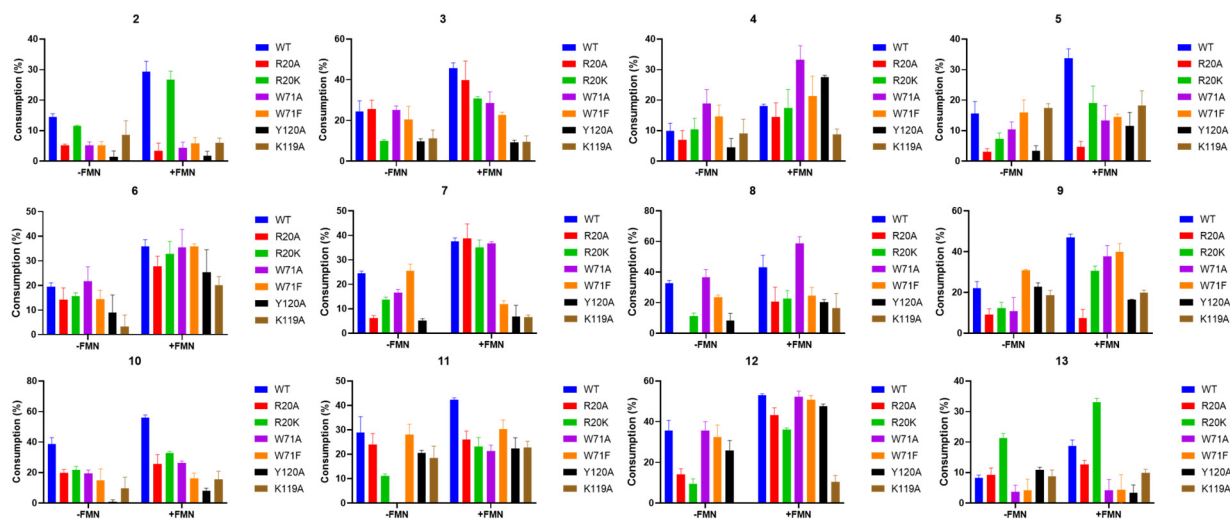

**Figure S19.** Consumption of compounds **2-13** by WT HiNfsB and its R20A, R20K, W71A, W71A, Y120A and K119A mutants, with or without FMN supplement. The reaction was conducted using 2 mM substrate mixing with (Full) or without (NC) 0.1  $\mu$ M enzyme, along with NADPH/GDH electron regeneration system. The reaction was incubated for 10 min. Catalytic activities of the enzyme are represented by substrate conversion ratio based on the peak areas of the substrates detected under 320 nm or 276 nm in HPLC. The data represent means  $\pm$  s.d. of three independent experiments.

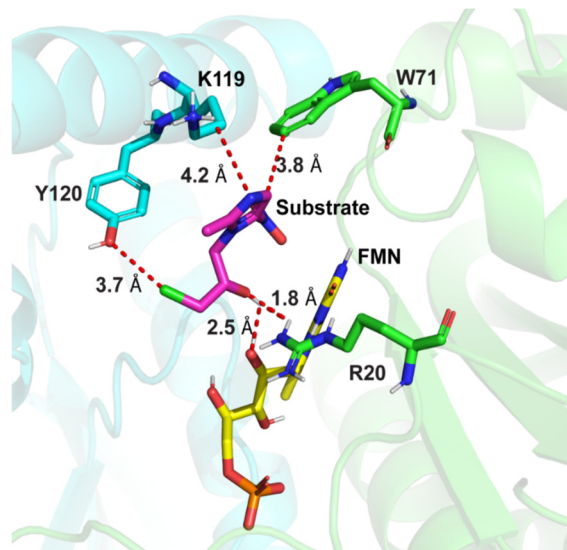

**Figure S20.** Molecular docking of ornidazole identified Arg20, Trp71, Lys119 and Tyr120 as critical residues for substrate binding.

```

ATGACTCAACTTACTCGTGAACAAGTTCTTGAAGTCTTCCATCAACGCAGCTCAACACGTTA
TTACGACCCAACAAAAAATCAGTGATGAAGATTTTGAATGTATTTAGAGTGCGGTCGAT
TATCGCCGAGTTCTGTAGGCTCTGAGCCTTGAAATTTTTAGTGATTCAAATAAAACCTTA
CGCGAAAAAATGAAACCTTTTAGCTGGGGAATGATAAATCAGCTTGATAATTGCAGTCATCT
TGTGGTAATTCTCGCGAAGAAAAATGCCCGTTATGATAGTCCGTTTTTTGTGGATGTGATG
GCACGCAAAGGCTTGAACGCAGAGCAACAACAAGCCGCCCTCACAAAATACAAAGCCCTG
CAAGAAGAAGATATGAAATTAAGTAAACGACCCGCACTTTATTTGATTGGTGCAGCAAACA
AACTTATATCGCCCTTGCAAATATGCTTACTGGAGCTTCAGCCCTTGGCATCGACTCTTGC
CCAATTGAAGGTTTTTCATTACGACAAAATGAATGAATGCCTCGCCGAAGAAGGATTATTCGA
TCCTCAAGAATATGCGGTTTCTGTGCGCCGCAACCTTTGGCTATCGCTCACGCGATATTGCG
AAAAAATCCCGTAAAGGATTGGATGAAGTGGTGAATGGGTGGGGTAA

```

**Figure S21.** DNA sequence of codon-optimized HiNFsB.
